# Supplementary material
Source: PubMed Central journal article supplement (PMC5556885)
Supplement: JCOPDF-2-223-s001.pdf [file JCOPDF-2-223-s001.pdf]

**Online Data Supplement**

**Effects of GOLD-Adherent Prescribing on COPD Symptom Burden, Exacerbations, and Health Care Utilization in a Real-World Setting**

David M. Mannino, MD<sup>1</sup> Tzy-Chyi Yu, MHA, PhD<sup>2</sup> Huanxue Zhou, MS<sup>3</sup>

Keiko Higuchi, MPH<sup>2</sup>

<sup>1</sup>University of Kentucky College of Public Health, Lexington, Kentucky

<sup>2</sup>Novartis Pharmaceuticals Company, East Hanover, New Jersey

<sup>3</sup>KMK Consulting Inc., Florham Park, New Jersey

**Table S1. Patient Characteristics by Treatment Group**

|                       | <b>GOLD-</b>        | <b>GOLD-</b>       | <b>GOLD-</b>        | <b>GOLD-</b>        |
|-----------------------|---------------------|--------------------|---------------------|---------------------|
|                       | <b>No Treatment</b> | <b>Nonadherent</b> | <b>Nonadherent,</b> | <b>Nonadherent,</b> |
| <b>Characteristic</b> | <b>(n=1521)</b>     | <b>Treatment</b>   | <b>Undertreated</b> | <b>Overtreated</b>  |
|                       |                     |                    |                     | <b>Adherent</b>     |
|                       |                     |                    |                     | <b>Treatment</b>    |

|                                                                              | (n=2703)    | (n=1158)    | (n=1545)    | (n=1531)    |
|------------------------------------------------------------------------------|-------------|-------------|-------------|-------------|
| <b>Resource utilization in 180 days before index date,<sup>a</sup> n (%)</b> |             |             |             |             |
| <i>All Cause</i>                                                             |             |             |             |             |
| ED visit                                                                     |             |             |             |             |
| Leading to any                                                               | 37 (2.4)    | 46 (1.7)    | 26 (2.2)    | 20 (1.3)    |
| hospitalization                                                              |             |             |             |             |
| Not leading to                                                               | 138 (9.1)   | 144 (5.3)   | 65 (5.6)    | 79 (5.1)    |
| any                                                                          |             |             |             |             |
| hospitalization                                                              |             |             |             |             |
| Office visit                                                                 | 1266 (83.2) | 2099 (77.7) | 887 (76.6)  | 1212 (78.4) |
| Other outpatient                                                             | 1416 (93.1) | 2584 (95.6) | 1106 (95.5) | 1478 (95.7) |
| visit                                                                        |             |             |             |             |
| <i>Respiratory - specific</i>                                                |             |             |             |             |
| ED visit                                                                     |             |             |             |             |
| Leading to any                                                               | 6 (0.4)     | 19 (0.7)    | 12 (1.0)    | 7 (0.5)     |

|                  |            |             |            |            |            |
|------------------|------------|-------------|------------|------------|------------|
| hospitalization  |            |             |            |            |            |
| Not leading to   | 27 (1.8)   | 68 (2.5)    | 37 (3.2)   | 31 (2.0)   | 34 (2.2)   |
| any              |            |             |            |            |            |
| hospitalization  |            |             |            |            |            |
| Office visit     | 427 (28.1) | 1409 (52.1) | 646 (55.8) | 763 (49.4) | 720 (47.0) |
| Other outpatient | 403 (26.5) | 1414 (52.3) | 547 (47.2) | 867 (56.1) | 838 (54.7) |
| visit            |            |             |            |            |            |

---

ED=emergency department; GOLD=Global initiative for chronic Obstructive Lung Disease

<sup>a</sup>For untreated patients, 180 days before GOLD assignment date

**Table S2. Effect of GOLD-Adherent and -Nonadherent Prescribing During 180 Days Following Index Treatment Start**

| <b>Categorical Variables</b>                             | <b>GOLD-Adherent,<br/>n (%)</b> | <b>GOLD-<br/>Nonadherent,<sup>a</sup> n (%)</b> | <b>Odds Ratio<sup>b</sup> (95% CI)</b> | <b>P Value<sup>c</sup></b> |
|----------------------------------------------------------|---------------------------------|-------------------------------------------------|----------------------------------------|----------------------------|
| <b>Exacerbation</b>                                      |                                 |                                                 |                                        |                            |
| Medication (oral/intravenous steroids + antibiotics) use | 164 (10.7)                      | 284 (10.5)                                      | 1.02 (0.83 to 1.25)                    | 0.8349                     |
| COPD-related ED visit                                    | 27 (1.8)                        | 63 (2.3)                                        | 0.75 (0.48 to 1.19)                    | 0.2189                     |
| COPD-related hospitalization                             | 15 (1.0)                        | 33 (1.2)                                        | 0.80 (0.43 to 1.48)                    | 0.4765                     |
| <b>HCRU</b>                                              |                                 |                                                 |                                        |                            |
| <i>All Cause</i>                                         |                                 |                                                 |                                        |                            |
| ED visit                                                 |                                 |                                                 |                                        |                            |
| Leading to any hospitalization                           | 10 (0.7)                        | 32 (1.2)                                        | 0.55 (0.27 to 1.12)                    | 0.0941                     |
| Not leading to any hospitalization                       | 50 (3.3)                        | 142 (5.3)                                       | 0.61 (0.44 to 0.85)                    | 0.0028                     |
| Office visit                                             | 1090 (71.2)                     | 1974 (73.0)                                     | 0.91 (0.79 to 1.05)                    | 0.1996                     |
| Other outpatient visit                                   | 1404 (91.7)                     | 2457 (90.9)                                     | 1.11 (0.88 to 1.38)                    | 0.3741                     |

***Respiratory-specific***

|                                                          |                       |                          |                                    |                            |
|----------------------------------------------------------|-----------------------|--------------------------|------------------------------------|----------------------------|
| ED visit                                                 |                       |                          |                                    |                            |
| Leading to any hospitalization                           | 5 (0.3)               | 16 (0.6)                 | 0.55 (0.20 to 1.51)                | 0.2377                     |
| Not leading to any hospitalization                       | 30 (2.0)              | 84 (3.1)                 | 0.62 (0.41 to 0.95)                | 0.0266                     |
| Office visit                                             | 610 (39.8)            | 1125 (41.6)              | 0.93 (0.82 to 1.06)                | 0.2586                     |
| Other outpatient visit                                   | 684 (44.7)            | 1105 (40.9)              | 1.17 (1.03 to 1.33)                | 0.0163                     |
|                                                          | <b>GOLD-Adherent,</b> | <b>GOLD-Nonadherent,</b> | <b>Mean Difference<sup>d</sup></b> |                            |
| <b>Continuous Variables</b>                              | <b>Mean (SD)</b>      | <b>Mean (SD)</b>         | <b>(95% CI)</b>                    | <b>P Value<sup>e</sup></b> |
| <b>Frequency of Exacerbation</b>                         |                       |                          |                                    |                            |
| Medication (oral/intravenous steroids + antibiotics) use | 0.14 (0.46)           | 0.13 (0.43)              | 0.0093 (−0.019 to 0.037)           | 0.5161                     |
| COPD-related ED visit                                    | 0.02 (0.27)           | 0.03 (0.18)              | −0.0021 (−0.017 to 0.013)          | 0.7860                     |
| COPD-related hospitalization                             | 0.01 (0.15)           | 0.02 (0.16)              | −0.0018 (−0.011 to 0.008)          | 0.7087                     |
| <b>Frequency of HCRU</b>                                 |                       |                          |                                    |                            |
| <b>All Cause</b>                                         |                       |                          |                                    |                            |
| Hospitalization                                          | 0.06 (0.32)           | 0.08 (0.38)              | −0.0222 (−0.044 to −0.001)         | 0.0424                     |

|                                    |             |              |                             |        |
|------------------------------------|-------------|--------------|-----------------------------|--------|
| ED visit                           | 0.06 (0.38) | 0.09 (0.40)  | -0.0311 (-0.055 to -0.007)  | 0.0122 |
| Leading to any hospitalization     | 0.01 (0.09) | 0.01 (0.14)  | -0.0072 (-0.014 to -0.000)  | 0.0444 |
| Not leading to any hospitalization | 0.05 (0.36) | 0.07 (0.34)  | -0.0238 (-0.046 to -0.002)  | 0.0359 |
| Office visit                       | 4.32 (5.85) | 4.97 (6.45)  | -0.6531 (-0.1034 to -0.272) | 0.0008 |
| Other outpatient visit             | 9.73 (9.66) | 9.89 (10.56) | -0.1580 (-0.785 to 0.469)   | 0.6211 |
| <b><i>Respiratory-specific</i></b> |             |              |                             |        |
| Hospitalization                    | 0.02 (0.17) | 0.02 (0.17)  | -0.0018 (-0.012 to 0.009)   | 0.7354 |
| ED visit                           | 0.03 (0.28) | 0.04 (0.24)  | -0.0124 (-0.029 to 0.004)   | 0.1435 |
| Leading to any hospitalization     | 0.00 (0.06) | 0.01 (0.08)  | -0.0030 (-0.007 to 0.001)   | 0.1639 |
| Not leading to any hospitalization | 0.03 (0.28) | 0.04 (0.24)  | -0.0094 (-0.025 to 0.007)   | 0.2464 |
| Office visit                       | 0.95 (2.18) | 0.98 (1.86)  | -0.0295 (-0.159 to 0.100)   | 0.6563 |
| Other outpatient visit             | 0.89 (1.42) | 0.75 (1.28)  | 0.1366 (0.050 to 0.223)     | 0.0019 |

---

COPD=chronic obstructive pulmonary disease; ED=emergency department; GOLD=Global initiative for chronic Obstructive Lung Disease; HCRU=health care resource utilization

<sup>a</sup>Combines undertreated and overtreated patients

<sup>b</sup>GOLD-adherent vs nonadherent

<sup>c</sup>Chi-square test (or Fisher exact test when  $\geq 20\%$  of the cells have an expected value  $< 5$ )

<sup>d</sup> Adherent minus nonadherent.

<sup>e</sup> 2-sample  $t$  test with unequal variance.

**Table S3. Effect of GOLD-Adherent Prescribing Versus Undertreatment During 180 Days Following Index Treatment Start**

| Categorical Variables                                       | GOLD-<br>Adherent, n (%) | Undertreatment, n<br>(%) | Odds Ratio <sup>a</sup> (95% CI) | P Value <sup>b</sup> |
|-------------------------------------------------------------|--------------------------|--------------------------|----------------------------------|----------------------|
| <b>Exacerbation</b>                                         |                          |                          |                                  |                      |
| Medication (oral/intravenous steroids +<br>antibiotics) use | 164 (10.7)               | 155 (13.4)               | 0.78 (0.61 to 0.98)              | 0.0338               |
| COPD-related ED visit                                       | 27 (1.8)                 | 27 (2.3)                 | 0.75 (0.44 to 1.29)              | 0.2984               |
| COPD-related hospitalization                                | 15 (1.0)                 | 9 (0.8)                  | 1.26 (0.55 to 2.90)              | 0.5803               |
| <b>HCRU</b>                                                 |                          |                          |                                  |                      |
| <i>All Cause</i>                                            |                          |                          |                                  |                      |
| ED visit                                                    |                          |                          |                                  |                      |
| Leading to any hospitalization                              | 10 (0.7)                 | 20 (1.7)                 | 0.37 (0.17 to 0.80)              | 0.0087               |
| Not leading to any hospitalization                          | 50 (3.3)                 | 57 (4.9)                 | 0.65 (0.44 to 0.96)              | 0.0296               |
| Office visit                                                | 1090 (71.2)              | 863 (74.5)               | 0.84 (0.71 to 1.00)              | 0.0552               |
| Other outpatient visit                                      | 1404 (91.7)              | 1039 (89.7)              | 1.27 (0.97 to 1.65)              | 0.0777               |



***Respiratory-specific***

|                                                             |                  |                          |                                    |                            |
|-------------------------------------------------------------|------------------|--------------------------|------------------------------------|----------------------------|
| ED visit                                                    |                  |                          |                                    |                            |
| Leading to any hospitalization                              | 5 (0.3)          | 11 (0.9)                 | 0.34 (0.12 to 0.99)                | 0.0374                     |
| Not leading to any hospitalization                          | 30 (2.0)         | 35 (3.0)                 | 0.64 (0.39 to 1.05)                | 0.0756                     |
| Office visit                                                | 610 (39.8)       | 547 (47.2)               | 0.74 (0.63 to 0.86)                | 0.0001                     |
| Other outpatient visit                                      | 684 (44.7)       | 441 (38.1)               | 1.31 (1.12 to 1.53)                | 0.0006                     |
| <hr/>                                                       |                  |                          |                                    |                            |
|                                                             | <b>GOLD-</b>     |                          |                                    |                            |
|                                                             | <b>Adherent,</b> | <b>Undertreatment, n</b> | <b>Mean Difference<sup>c</sup></b> |                            |
| <b>Continuous Variables</b>                                 | <b>Mean (SD)</b> | <b>(%)</b>               | <b>(95% CI)</b>                    | <b>P Value<sup>d</sup></b> |
| <hr/>                                                       |                  |                          |                                    |                            |
| <b>Frequency of exacerbation</b>                            |                  |                          |                                    |                            |
| Medication (oral/intravenous steroids +<br>antibiotics) use | 0.14 (0.46)      | 0.17 (0.47)              | -0.0258<br>(-0.0613 to 0.0097)     | 0.1546                     |
| COPD-related ED visit                                       | 0.02 (0.27)      | 0.03 (0.18)              | -0.0017<br>(-0.0188 to 0.0153)     | 0.8415                     |
| COPD-related hospitalization                                | 0.01 (0.15)      | 0.01 (0.15)              | 0.0025<br>(-0.0091 to 0.0141)      | 0.6732                     |

**Frequency of HCRU***All Cause*

|                                    |             |               |                                 |        |
|------------------------------------|-------------|---------------|---------------------------------|--------|
| Hospitalization                    | 0.06 (0.32) | 0.09 (0.43)   | -0.0345<br>(-0.0639 to -0.0051) | 0.0215 |
| ED visit                           | 0.06 (0.38) | 0.09 (0.41)   | -0.0308<br>(-0.0611 to -0.0006) | 0.0455 |
| Leading to any hospitalization     | 0.01 (0.09) | 0.02 (0.18)   | -0.0144<br>(-0.0256 to -0.0032) | 0.0119 |
| Not leading to any hospitalization | 0.05 (0.36) | 0.06 (0.32)   | -0.0164<br>(-0.0421 to 0.0092)  | 0.2095 |
| Office visit                       | 4.32 (5.85) | 5.78 (6.90)   | -1.4550<br>(-1.9490 to -0.9610) | 0.0000 |
| Other outpatient visit             | 9.73 (9.66) | 10.08 (11.13) | -0.3527<br>(-1.1563 to 0.4510)  | 0.3896 |

*Respiratory-specific*

|                 |             |             |        |        |
|-----------------|-------------|-------------|--------|--------|
| Hospitalization | 0.02 (0.17) | 0.01 (0.17) | 0.0016 | 0.8007 |
|-----------------|-------------|-------------|--------|--------|

|                                    |             |             |                                 |        |
|------------------------------------|-------------|-------------|---------------------------------|--------|
|                                    |             |             | (-0.0112 to 0.0145)             |        |
| ED visit                           | 0.03 (0.28) | 0.04 (0.24) | -0.0146<br>(-0.0345 to 0.0052)  | 0.1479 |
| Leading to any hospitalization     | 0.00 (0.06) | 0.01 (0.11) | -0.0071<br>(-0.0140 to -0.0002) | 0.0447 |
| Not leading to any hospitalization | 0.03 (0.27) | 0.03 (0.20) | -0.0076<br>(-0.0256 to 0.0105)  | 0.4119 |
| Office visit                       | 0.95 (2.18) | 1.19 (1.99) | -0.2392<br>(-0.3975 to -0.0809) | 0.0031 |
| Other outpatient visit             | 0.89 (1.42) | 0.73 (1.28) | 0.1647 (0.0621 to 0.2673)       | 0.0017 |

---

COPD=chronic obstructive pulmonary disease; ED=emergency department; GOLD=Global initiative for chronic Obstructive Lung Disease; HCRU=health care resource utilization

<sup>a</sup>GOLD-adherent versus undertreated

<sup>b</sup>Chi-square test (Fisher exact test is employed when  $\geq 20\%$  of the cells have an expected value  $< 5$ )

<sup>c</sup>GOLD-adherent minus undertreated

<sup>d</sup>2-sample *t* test with unequal variance

**Table S4. Effect of GOLD-Adherent Prescribing Versus Overtreatment During 180 Days Following Index Treatment Start**

| <b>Categorical Variables</b>                             | <b>GOLD-<br/>Adherent, n (%)</b> | <b>Overtreatment, n<br/>(%)</b> | <b>Odds Ratio<sup>a</sup> (95% CI)</b> | <b>P Value<sup>b</sup></b> |
|----------------------------------------------------------|----------------------------------|---------------------------------|----------------------------------------|----------------------------|
| <b>Exacerbation</b>                                      |                                  |                                 |                                        |                            |
| Medication (oral/intravenous steroids + antibiotics) use | 164 (10.7)                       | 129 (8.3)                       | 1.32 (1.03 to 1.68)                    | 0.0256                     |
| COPD-related ED visit                                    | 27 (1.8)                         | 36 (2.3)                        | 0.75 (0.45 to 1.25)                    | 0.2673                     |
| COPD-related hospitalization                             | 15 (1.0)                         | 24 (1.6)                        | 0.63 (0.33 to 1.20)                    | 0.1551                     |
| <b>HCRU</b>                                              |                                  |                                 |                                        |                            |
| <i>All Cause</i>                                         |                                  |                                 |                                        |                            |
| ED visit                                                 |                                  |                                 |                                        |                            |
| Leading to any hospitalization                           | 10 (0.7)                         | 12 (0.8)                        | 0.84 (0.36 to 1.95)                    | 0.6844                     |
| Not leading to any hospitalization                       | 50 (3.3)                         | 85 (5.5)                        | 0.58 (0.41 to 0.83)                    | 0.0025                     |
| Office visit                                             | 1090 (71.2)                      | 1111 (71.9)                     | 0.97 (0.83 to 1.13)                    | 0.6607                     |
| Other outpatient visit                                   | 1404 (91.7)                      | 1418 (91.8)                     | 0.99 (0.77 to 1.28)                    | 0.9396                     |

***Respiratory-specific***

|                                                             |                  |                         |                                    |                            |
|-------------------------------------------------------------|------------------|-------------------------|------------------------------------|----------------------------|
| ED visit                                                    |                  |                         |                                    |                            |
| Leading to any hospitalization                              | 5 (0.3)          | 5 (0.3)                 | 1.01 (0.23 to 4.39)                | 1.0000                     |
| Not leading to any hospitalization                          | 30 (2.0)         | 49 (3.2)                | 0.61 (0.39 to 0.97)                | 0.0336                     |
| Office visit                                                | 610 (39.8)       | 578 (37.4)              | 1.11 (0.96 to 1.28)                | 0.1660                     |
| Other outpatient visit                                      | 684 (44.7)       | 664 (43.0)              | 1.07 (0.93 to 1.24)                | 0.3422                     |
| <hr/>                                                       |                  |                         |                                    |                            |
|                                                             | <b>GOLD-</b>     |                         |                                    |                            |
|                                                             | <b>Adherent,</b> | <b>Overtreatment, n</b> | <b>Mean Difference<sup>c</sup></b> |                            |
| <b>Continuous Variables</b>                                 | <b>Mean (SD)</b> | <b>(%)</b>              | <b>(95% CI)</b>                    | <b>P Value<sup>d</sup></b> |
| <hr/>                                                       |                  |                         |                                    |                            |
| <b>Frequency of exacerbation</b>                            |                  |                         |                                    |                            |
| Medication (oral/intravenous steroids +<br>antibiotics) use | 0.14 (0.46)      | 0.11 (0.40)             | 0.0356<br>(0.0054 to 0.0658)       | 0.0210                     |
| COPD-related ED visit                                       | 0.02 (0.27)      | 0.03 (0.18)             | -0.0024<br>(-0.0186 to 0.0139)     | 0.7751                     |
| COPD-related hospitalization                                | 0.01 (0.15)      | 0.02 (0.16)             | -0.0051<br>(-0.0160 to 0.0059)     | 0.3637                     |

**Frequency of HCRU***All Cause*

|                                    |             |              |                                 |        |
|------------------------------------|-------------|--------------|---------------------------------|--------|
| Hospitalization                    | 0.06 (0.32) | 0.07 (0.33)  | -0.0131<br>(-0.0362 to 0.0101)  | 0.2689 |
| ED visit                           | 0.06 (0.38) | 0.09 (0.40)  | -0.0312<br>(-0.0587 to -0.0037) | 0.0260 |
| Leading to any hospitalization     | 0.01 (0.09) | 0.01 (0.11)  | -0.0019 (-0.0089 to<br>0.0052)  | 0.6029 |
| Not leading to any hospitalization | 0.05 (0.36) | 0.08 (0.36)  | -0.0293<br>(-0.0549 to -0.0037) | 0.0247 |
| Office visit                       | 4.32 (5.85) | 4.37 (6.03)  | -0.0521<br>(-0.4719 to 0.3677)  | 0.8078 |
| Other outpatient visit             | 9.73 (9.66) | 9.74 (10.11) | -0.0122<br>(-0.7113 to 0.6870)  | 0.9728 |

*Respiratory-specific*

|                 |             |             |         |        |
|-----------------|-------------|-------------|---------|--------|
| Hospitalization | 0.02 (0.17) | 0.02 (0.16) | -0.0044 | 0.4621 |
|-----------------|-------------|-------------|---------|--------|

|                                    |             |             |                                |        |
|------------------------------------|-------------|-------------|--------------------------------|--------|
|                                    |             |             | (-0.0161 to 0.0073)            |        |
| ED visit                           | 0.03 (0.28) | 0.04 (0.23) | -0.0107<br>(-0.0289 to 0.0075) | 0.2473 |
| Leading to any hospitalization     | 0.00 (0.06) | 0.00 (0.06) | 0.0000<br>(-0.0040 to 0.0041)  | 0.9885 |
| Not leading to any hospitalization | 0.03 (0.27) | 0.04 (0.22) | -0.0108 (-0.0283 to<br>0.0067) | 0.2277 |
| Office visit                       | 0.95 (2.18) | 0.82 (1.74) | 0.1277 (-0.0119 to 0.2673)     | 0.0730 |
| Other outpatient visit             | 0.89 (1.42) | 0.78 (1.28) | 0.1155 (0.0198 to 0.2112)      | 0.0180 |

---

COPD=chronic obstructive pulmonary disease; ED=emergency department; GOLD=Global initiative for chronic Obstructive Lung Disease; HCRU=health care resource utilization

<sup>a</sup>GOLD-adherent versus overtreated

<sup>b</sup>Chi-square test (Fisher exact test is employed when  $\geq 20\%$  of the cells have an expected value  $< 5$ )

<sup>c</sup>GOLD-adherent minus overtreated

<sup>d</sup>2-sample *t* test with unequal variance.
